# Supplementary material for: Permeability to value: a methodological framework for designing demand-driven value-based innovation procurements and its application
Source: Research Square preprint supplement (doi:10.21203/rs.3.rs-5609699/v1), 2025-03-26
Supplement: Supplementary file 1 [file 0de691d4e6dc823b7ddadcbd.docx]

**Supplementary table 3.** Application of the PiPPi results set to the tender documents of OncNGS, TIQUE and EcoQUIP Plus respectively - OncNGS, TIQUE and EcoQUIP Plus elements identified as Long-term outcome/impact – to be defined with quantitative/qualitative indicators once intervention will scale beyond given agreed sample size during the commercialization phase

| **Procurement procedure** | **oncNGS Category** | **oncNGS Subcategory** | **oncNGS Long Term Result** |
| --- | --- | --- | --- |
| **oncNGS** | **Patient** | Patient-Reported Outcome Measures | Health-related Quality of Life (QoL)  *Diagnostic markers, Prognostics markers, Predictive markers and Theranostic markers*  *D2 Standardization results is increased equality in cancer care* |
| Symptom severity  *Diagnostic markers, Prognostics markers, Predictive markers and Theranostic markers*  *ACCE Clinical Utility: Is there an effective remedy, acceptable action, or other measurable benefit?* |
| Patient-Reported Experience Measures | Understanding of care plan/treatment/pathways  *D1 dimension: avoid unnecessary treatment*  *D3: International collaboration, capitalizes experience, better advice for patient treatment*  *ACCE Clinical Utility: What is the impact of a positive (or negative) test on patient care?* |
| Confidence in the treatment  *Diagnostic markers, Prognostics markers, Predictive markers and Theranostic markers* |
| Determinants of health | Novel treatment opportunities  *D1 dimension: Novel treatment opportunities*  *Interim endpoint:*  *Predictive markers and Theranostic markers*  *oncNGS Outcome:*  *Affordable and low-turn around time solution for routine basis, at each (chemo)therapy cycle to follow clinical response and inspire adaptive therapies* |
| Diagnostic accuracy  *Diagnostic markers*  *D1 dimension: better diagnosis*  *ACCE Clinical Utility: If applicable, are diagnostic tests available?*  *oncNGS Outcome:*  *Improve sensitivity for a reliable detection of low amounts of ctDNA and low frequency mutations from a routine blood draw. Overcome limits of low ctDNA, low VAF.* |
| Quality Adjusted Life Years (QALY) |
| Reduction of variability in patient results  *Diagnostic markers, Prognostics markers, Predictive markers and Theranostic markers*  *D2 Standardization results is increased equality in cancer care*  (Elaboration from ACCE Clinical Utility) Reduction of impact/probability of health risks  *Predictive markers and Theranostic markers* |
| (Elaboration from ACCE Clinical Utility) Reduction of impact/probability of health risks  *Predictive markers and Theranostic markers* |
| Overtreatment cases identification  *Prognostics markers, Predictive markers and Theranostic markers* |
| Long-Term treatment improvement | Mortality  *Diagnostic markers, Predictive markers and Theranostic markers* |
| Disability  *Prognostics markers, Predictive markers and Theranostic markers* |
| Morbidity  *Diagnostic markers, Prognostics markers, Predictive markers and Theranostic markers* |
| **Healthcare Professionals** | Benefits for the HCP | Proportion of professional with opportunities to provide care to patients  *D6: Access to innovation, increased opportunities to provide care to patients* |
| Proportion of professional with access to medical Evidence-Based information, and training to benefit from their use  *D5: International collaboration, increase experience and knowledge of Health professionals* |
| **Healthcare provider** | Organisational aspects | Reduction in medication consumption  *Prognostics markers, Predictive markers and Theranostic markers* |
| Evidence-based guidelines |
| **Health system** | Long-Term treatment improvement | Mortality  *Diagnostic markers, Predictive markers and Theranostic markers* |
| Disability  *Prognostics markers, Predictive markers and Theranostic markers* |
| Economic Sustainability | Investments in equipment |
| Investment in hardware and software/digital services  *oncNGS Outcome:*  *Affordable and low turn-around time solution for routine basis, at each (chemo)therapy cycle to follow clinical response and inspire adaptive therapies* |
| Diagnostics  *Diagnostic markers*  *D10: Sustainable budget management for complex diagnostics*  *ACCE Clinical Utility: If applicable, are diagnostic tests available?* |
| Prognosis  *Prognostics markers*  *D12: Foresight prognosis based on evidence gathered in routine diagnostics in multiple EU countries (higher prognostic power)* |
| Healthcare providers transparent budget monitoring  *D13: Facilitating transparent monitoring of HC budget allocation and performance* |
| **Socio-economic impact** | Economic Evaluation and HTA | Cost Utility Analysis; Cost Effectiveness Analysis  *ACCE Clinical Utility: What are the economic benefits associated with actions resulting from testing?* |
| Equalities considerations  *D2 Standardization results is increased equality in cancer care*  *ACCE Clinical utility: Is there general access to that remedy or action?*  *ACCE Clinical utility: Is the test being offered to a socially vulnerable population?* |
| Cost Benefit analysis  *ACCE Clinical Utility: What are the economic benefits associated with actions resulting from testing?* |
| Cost minimization analysis  *ACCE Clinical Utility: What are the economic benefits associated with actions resulting from testing?* |
| Health benefit in PROMs per health care dollar |
|  | **TIQUE Category** | **TIQUE Subcategory** | **TIQUE Long Term Result** |
| **TIQUE** | Patient | PROM | Health-related Quality of life (QoL)  Metrics on KCCQ-121, and NYHA about peripheral oedema, disturbed sleep, maximum level of physical exertion, health related quality of life.  SF-12 Physical  SF-12 Mental  Pain |
| Overall Satisfaction with care given  % of patients who express satisfaction with the new service >66,6%  % of family member who express satisfaction with the new service >66,6% |
| Understanding of care plan/treatment/pathways |
| Support to manage long-term condition |
| Self-reported health status |
| Improving Behaviour Outcome  # reached objectives for exercise each day |
| Bio-psycho-social functioning  Metrics on Living Independently (PROMIS) and depression and anxiety (PHQ94), confidence/self- esteem |
| Symptom severity  # Congestion detected without the use of invasive tools  Body Mass Index (BMI)  Albumin  LDL Cholesterol levels  Systolic blood pressure  FEV1 |
| PREM | # Reduction in waiting times |
| % Reduction of patients and relatives' use of time |
| Determinants of Health | Adherence to clinical guidelines |
| Adherence to intervention/treatment |
| # of patient complications of treatment (due to device, medication and/or hospitalization) and Adverse events |
| Overtreatment cases identification |
| % of Relapse  # Hospitalization related to Heart Failure decompensations |
| # of medication side-effects or Drug-related health problems (adverse effects, safety, drug-related morbidity). |
| Healthcare Professionals | Benefits for the HCP | % healthcare professionals who express satisfaction with the new service>66,6% |
| Workplace environment/culture outcomes | Evaluating changes in the culture of your organization |
| Healthcare provider | Organizational aspects | Number of rehospitalisations/readmissions rates  Reductions of hospital readmissions after 30 days 25%  Inpatient episodes |
| Number of bed days for hospitalized patients |
| Provision of home care attention Increase > 20%  Visits in primary care Reduction > 20%  # of Home Hospitalization  the proportion of older people with intensive care needs and/or lower levels of care needs who are receiving care at home  the proportion of older people receiving (free) personal care at home  home care provision for older people  respite care for informal carers  council/municipality provision of supported or sheltered accommodation  information on care homes  Number of visits in primary care  Family physicians’ visits at PHC (primary healthcare centres)  Family nurses’ visits at PHC  Family physician home-visits  Family nurses home-visits  primary care consultations  Unplanned potentially preventable inpatient episodes  information on unscheduled care |
| Number of urgent visits  # of ED attendances  # Days in the emergency room in the last 6 months  # Home care assistants not requiring emergency interventions  Reduction of acute hospital emergency admission 40%  Emergency episodes at PHC  Emergency episodes at hospitals  Numbers of emergency department visits  Numbers and diagnoses for emergency hospital admissions and multiple emergency hospital admissions  Number of specialist visits  # of follow-up Hospital’s Appointments  Outpatient visits  Numbers of outpatient attendances  Actual vs. Expected hospital stay |
| Reduction of hospital deaths for hospitalized patients 10%  Increased end-of-life care at home 10% |
| Process | Work flow assessment:  Management of Transitions  Communication  Delivery system organization  Governance  Comprehensiveness of the practice  Evaluation  Person-centredness  Organized into integrated practice units or Re-designing and improving the pathways in order to add value to patients  Multidisciplinary Team (Health and care professionals) |
| Costs | Length of hospital stays  Delayed discharge from hospital  Total costs per year of the no. of extension of the LOS compared to average LOS/patient  Total costs per year of the no. of cases that represent a significant extension of the LOS compared to the LOS reimbursed by the insurer |
| Health System | Long-Term treatment improvement | 1-year survival rate after diagnosis 33%  2-year survival  5-year survival |
| Socio-economic impact | Economic Evaluation and HTA | Patient outcomes, experiences and safety  Costs at patient level |
| Social determinants | -Equal access to health care for those in equal need of health care.  -Equal utilisation of health care for those in equal need of health care.  -Equal (or, rather, equitable) health outcomes (as measured by, for example, quality adjusted life expectancy). |
|  | EcoQUIP Plus **Category** | EcoQUIP Plus **Subcategory** | EcoQUIP Plus **Long Term Result** |
| **EcoQUIP Plus** | Patient | PROM | Health-related Quality of life (QoL)  Metrics on KCCQ-121, and NYHA about peripheral oedema, disturbed sleep, maximum level of physical exertion, health related quality of life.  SF-12 Physical  SF-12 Mental  Pain |
| Overall Satisfaction with care given  % of patients who express satisfaction with the new service >66,6%  % of family member who express satisfaction with the new service >66,6% |
| Understanding of care plan/treatment/pathways |
| Support to manage long-term condition |
| Self-reported health status |
| Improving Behaviour Outcome  # reached objectives for exercise each day |
| Bio-psycho-social functioning  Metrics on Living Independently (PROMIS) and depression and anxiety (PHQ94), confidence/self- esteem |
| PREM | User evaluation of satisfaction |
| Determinants of Health | Adherence to clinical guidelines |
| Adherence to intervention/treatment |
| # of patient complications of treatment (due to device, medication and/or hospitalization) and Adverse events related with surgery such as: blood complications, microbial infections,... |
| Overtreatment cases identification |
| # of medication side-effects or Drug-related health problems (adverse effects, safety, drug-related morbidity). |
| Healthcare Professionals | Benefits for the HCP | % healthcare professionals who express satisfaction with the new service>66,6% |
| Workplace environment/culture outcomes | Evaluating changes in the culture of your organization |
| Healthcare provider | Organizational aspects | Number of rehospitalisations/readmissions rates  Reductions of hospital readmissions after 30 days 25%  Inpatient episodes |
| Number of bed days for hospitalized patients |
| Process | Work flow assessment  *Time reduction (past vs. present) in the design and impression delivery*  *Total traceability assurance* |
| Costs | Reduction of the Cost per case |
| Water and Energy Reduction Costs |
| Socio-economic impact | Economic Evaluation and HTA | Patient outcomes, experiences and safety  Costs at patient level |
| Social determinants | -Equal access to health care for those in equal need of health care.  -Equal utilisation of health care for those in equal need of health care.  -Equal (or, rather, equitable) health outcomes (as measured by, for example, quality adjusted life expectancy). |
