# Supplementary material for: Permeability to value: a methodological framework for designing demand-driven value-based innovation procurements and its application
Source: Research Square preprint supplement (doi:10.21203/rs.3.rs-5609699/v1), 2025-03-26
Supplement: Supplementary file 2 [file 7692c46e5e62e52560607dca.docx]

**Supplementary table 1.** Set of proposed results for any demand-driven PCP/PPI

| **Level** | **Sublevel** | **Output / Outcome** |
| --- | --- | --- |
| **Patient** | **Patient-Reported Outcome Measures** | Health-related Quality of life (QoL) |
| Self-reported health status |
| Improving Behaviour Outcome |
| Bio-psycho-social functioning |
| Autonomy |
| Symptom severity |
| Ability to work |
| Pain assessment |
| Exercise Tolerance |
| **Patient-Reported Experience Measures** | Acceptability in the co-creation process |
| Acceptability of the solution |
| Overall Satisfaction with care given |
| Easy to use and user experience |
| Involvement in decision-making |
| Bedroom comfortability |
| Satisfaction with hospital food |
| Professional's use of time |
| Waiting time |
| % Reduction of patients and relatives' use of time |
| Confidence in the treatment |
| Understanding of care plan/treatment/pathways |
| Would they recommend the service to family and friends? |
| Support to manage long-term condition |
| Community linkages |
| **Determinants of Health** | Adherence to clinical guidelines |
| Adherence to intervention/treatment |
| Initially defined in PiPPi as: Adverse drug effects. Updated and detailed in TIQUE as:  Drug-related health problems (adverse effects, safety, drug-related morbidity) |
| Adverse events |
| Hospital acquired infections |
| Diagnostic accuracy |
| Beneficence |
| Proportionality |
| Less surgery complications |
| QALYs |
| Overtreatment cases identification |
| Reduced clinical errors |
| Novel treatment opportunities |
| Reduction of variability in patient results |
| **Long-Term treatment improvement** | Mortality |
| Morbidity |
| Disability |
| Prevalence |
| Incidence |
| % of Relapse |
| **Healthcare Professionals** | **Benefits for the HCP** | Trust in health and social care professionals |
| Proportion of professional with access to medical Evidence-Based information, and training to benefit from their use |
| Proportion of professionals' adherence to clinical guidelines |
| Level of involvement in design process |
| Electronic medical records adequately performed |
| (Regular) doctor spending enough time with patients during the consultation |
| Usability of the solution |
| Acceptability of the solution |
| Proportion of professional with opportunities to provide care to patients |
| **Workplace environment/culture outcomes** | Training effectiveness for HCP |
| Safety environment |
| Team/organization culture |
| **Healthcare provider** | **Organisational aspects** | Number of hospitalizations |
| Waiting list time |
| Appointment statistics |
| Number of rehospitalisations/readmissions rates |
| Number of bed days for hospitalised patients |
| Number of primary clinic visits |
| Number of urgent visits |
| Number of specialist visits |
| Actual vs. Expected hospital stay |
| Applicability or external validity of the studies in the national/European health and social care system |
| Proportion of centres/professionals that adhere to appropriate clinical guidelines (up-to-date evidence based) |
| Reduction in medication consumption |
| Evidence-based guidelines |
| Diagnostics |
| Compliancy with new regulatory rules |
| Costs: Maintenance costs increase |
| Errors reduction / Increase in accuracy |
| Sensitivity |
| Home Hospitalization |
| Number of visits in primary care |
| Unplanned potentially preventable inpatient episodes |
| Patient wills |
| **Costs** | Approximated total income loss per year related to impact on potential admissions |
| Total costs per year of the no. of extension of the LOS compared to average LOS/patient |
| Total costs per year of the no. of cases that represent a significant extension of the LOS compared to the LOS reimbursed by the insurer |
| Medical device costs |
| Training Costs |
| Implementation costs |
| Maintenance costs |
| Dispensing medications at the hospital |
| Dispensing medications at the hospital per patient |
| **Process** | Work flow |
| Production efficiency |
| Reduction of process complexity |
| Training and resources |
| Attitude and Culture |
| Senior leadership performance |
| **Technological Aspects** | Interaction and communication |
| Interoperability concerns |
| Interoperability barriers |
| Interoperability approaches |
| Data security |
| Connectivity |
| Human Agency and Control |
| **Health System** | **Economic Sustainability** | Investments in equipment |
| Investment in hardware and software/digital services |
| Training of staff |
| Maintenance |
| Use of staff (for each of the relevant type of staff) |
| Medication / Treatments - Therapy / Prosthesis |
| Utensils |
| Patients’ use of time |
| Relatives’ use of time |
| Transportation |
| Scalability |
| Replicability |
| Reproducibility |
| Diagnostics |
| Prognosis |
| Healthcare providers transparent budget monitoring |
| **Safety and Sustainability** | Air Quality |
| Waste management |
| Data safety |
| Safety environment |
| The solution can evolve and be sustained over time |
| **Long-Term treatment improvement** | Mortality |
| Morbidity |
| Disability |
| Prevalence |
| Incidence |
| % of Relapse |
| Survival rate after diagnosis |
| **Socio-economic impact** | **Social determinants** | Education levels |
| Social cohesion |
| Social happiness |
| Level of social isolation |
| Socioeconomic status |
| Equalities considerations |
| **Economic Evaluation and HTA** | Cost Utility Analysis |
| Cost Effectiveness Analysis |
| Cost Benefit analysis |
| Cost minimization analysis |
| Health benefit in PROMs per health care dollar |
