# Supplementary material for: Permeability to value: a methodological framework for designing demand-driven value-based innovation procurements and its application
Source: Research Square preprint supplement (doi:10.21203/rs.3.rs-5609699/v1), 2025-03-26
Supplement: Supplementary file 3 [file 81c253cded97dcaed0a57e60.docx]

**Supplementary Table 2.** Application of the PiPPi results set to the tender documents of OncNGS, TIQUE and EcoQUIP Plus respectively - OncNGS, TIQUE and EcoQUIP Plus elements identified as Output/No-health outcome determined through the whole procedure:

| **oncNGS Category** | **oncNGS Subcategory --> To be included in the description of the object of the contract** | **oncNGS Bid Template** | **oncNGS Awarding Criteria dimension** | **oncNGS Contract Monitoring** | **oncNGS Expertise necessary to evaluate/monitor** |
| --- | --- | --- | --- | --- | --- |
| **Patients** | **Patient-Reported Experience Measures**  Understanding of care plan/treatment/pathways  *D1 dimension: avoid unnecessary treatment*  Interim endpoint:  *Diagnostic markers, Prognostics markers, Predictive markers and Theranostic markers* | Given coverage of the PANCANCER PANEL   PANEL Requirements | Technical Excellence | Technical Excellence | NGS panels, molecular biology,  molecular pathology, wet lab analysis,  bioinformatics, molecular interpretation, medical oncology |
| **Determinants of health**  Quality Adjusted Life Years (QALY)  Interim endpoint:  *Diagnostic markers, Prognostics markers, Predictive markers and Theranostic markers*  *WETLAB*  *Large Panels (up to 500 genes)*  *ctDNA/DNA germ/RNA (from liquid biopsy) converted to DNA*  *WETLAB Quality control:*  *<10ng ctDNA*  *Analytical Sensitivity (VAF [0.1-0.5%], min. [0.86-0.96])*  *Sample traceability*  *NGS harmonize pipeline*  *MOLECULAR INTERPRETATION*  *Harmonized biological interpretation*  *MOLECULAR INTERPRETATION Quality control:*  *Analytical accuracy – False positive (FP) rate, False negative (FN) rate.*  *Reproducibility among replicates*  *Sensitivity 0,5% CNA*  *MOLECULAR INTERPRETATION Outputs:*  *Genomic coordinates nomenclature of each variant automatically retrieved*  *REPORT OUTPUTS*  *Harmonized with International guidelines*  *REPORT Quality Control:*  *The information provided in the report has passed a QC and the norm/test followed* | Given coverage of the PANCANCER PANEL   PANEL Requirements  WETLAB Requirements  MOLECULAR INTERPRETATION Requirements  REPORT Requirements | Technical Excellence | Technical Excellence | NGS panels, molecular biology,  molecular pathology, wet lab analysis,  bioinformatics, molecular interpretation, medical oncology |
| **Determinants of health**  Novel treatment opportunities  *D1 dimension: Novel treatment opportunities*  *Interim endpoint:*  *Predictive markers and Theranostic markers*  *oncNGS Outcome:*  *Affordable and low-turn around time solution for routine basis, at each (chemo)therapy cycle to follow clinical response and inspire adaptive therapies* | BUSINESS CASE requirements  OUTCOME requirements | Value of benefits for patients: *Novel treatment opportunities*  Sustainability of the Business Case/  Scalability potential: *Affordable*   Value of benefits for procurers: *low-turn around time* | Value of benefits for patients: *Novel treatment opportunities*  Sustainability of the Business Case/  Scalability potential: *Affordable*   Value of benefits for procurers: *low-turn around time* | medical oncology, wet lab analysis,  bioinformatics, market access and/or general business knowledge, business angels and philanthropic social impact investors |
| **Healthcare Professionals** | **Benefits for the HCP**  Proportion of professional with access to medical Evidence-Based information, and training to benefit from their use  *D5: International collaboration, increase experience and knowledge of Health professionals* | BUSINESS CASE requirements | Sustainability of the Business Case/  Scalability potential | Sustainability of the Business Case/  Scalability potential | medical oncology, market access and/or general business knowledge,  business angels and philanthropic social impact investors |
| **Benefits for the HCP**  Proportion of professional with opportunities to provide care to patients  *D6: Access to innovation, increased opportunities to provide care to patients*  *Interim endpoint:*  *Predictive markers and Theranostic markers* | BUSINESS CASE requirements | Sustainability of the Business Case/  Scalability potential | Sustainability of the Business Case/  Scalability potential | medical oncology, market access and/or general business knowledge,  business angels and philanthropic social impact investors |
| **Benefits for the HCP**  Level of involvement in design process | DESIGN OF THE SOLUTION requirements | Relevance of the proposed way to involve clinicians and patients in design and development | Relevance of the proposed way to involve clinicians and patients in design and development | NGS panels, molecular biology,  molecular pathology, wet lab analysis,  bioinformatics, molecular interpretation, medical oncology |
| **Benefits for the HCP**  Electronic medical records adequately performed | REPORT Requirements | Soundness of the approach to integrate with procurer systems | Soundness of the approach to integrate with procurer systems | medical oncology, ICT interoperability |
| **Benefits for the HCP**  Usability of the solution | WETLAB Requirements | User configurability/ customisation | User configurability/ customisation | molecular biology,  molecular pathology,  wet lab analysis,  bioinformatics,  medical oncology, CE-IVD,  GDPR,  ICT interoperability,  market access and/or general business knowledge |
| **Benefits for the HCP**  Acceptability of the solution  *Interim endpoint:*  *BIOINFORMATICS:*  *Detailed description of standard data formats*  *All raw data accessible*  *AI for bioinformatics pipelines*  *Quality control:*  *FASTQ QC statistics*  *BAM QC statistics*  *Output compatible with EQA and future EU regulatory assessments*  *BIOINFORMATICS outputs:*  *FASTQ data files*  *BAM data files*  *Data robust, accurate, reproducible and traceable*  *Reference samples* | BIOINFORMATICS Requirements | Technical excellence | Technical excellence | bioinformatics,  CE-IVD,  GDPR |
| **Workplace environment/culture outcomes**  Training effectiveness for HCP |  | Value of benefits for procurers  Sustainability of the Business Case/  Scalability potential | Value of benefits for procurers  Sustainability of the Business Case/  Scalability potential | process design, market access and/or general business knowledge,  business angels and philanthropic social impact investors |
| **Workplace environment/culture outcomes**  Safety environment  *Sustainable and Environmentally friendly:*  *·Low plastic consumption*  *·Recyclable components*  *·Vendor neutral consumables* | OUTCOME requirements | Technical excellence | Technical excellence | waste/recycling material expert  market access and/or general business knowledge,  business angels and philanthropic social impact investors |
| **Workplace environment/culture outcomes**  Team/organization culture |  | Value of benefits for procurers  Sustainability of the Business Case/  Scalability potential | Value of benefits for procurers  Sustainability of the Business Case/  Scalability potential | process design, market access and/or general business knowledge,  business angels and philanthropic social impact investors |
| **Health Care provider** | **Organisational aspects**  *Diagnostic markers*  *D7: Sustainable purchase of expensive diagnostics*  *ACCE Clinical Utility: If applicable, are diagnostic tests available?* | Given coverage of the PANCANCER PANEL   BUSINESS CASE requirements | Value of benefits for procurers  Sustainability of the Business Case/  Scalability potential | Value of benefits for procurers  Sustainability of the Business Case/  Scalability potential | medical oncology,  market access and/or general business knowledge,  business angels and philanthropic social impact investors |
| **Maintenance costs**  *Business case: increase year by year less than 10%*  *ACCE Clinical Utility: What are the financial costs associated with testing?* | BUSINESS CASE requirements | Sustainability of the Business Case/  Scalability potential | Sustainability of the Business Case/  Scalability potential | medical oncology,  market access and/or general business knowledge,  business angels and philanthropic social impact investors |
| **Process**  Work flow  *WETLAB*  *Simple and easy protocols* | WETLAB requirements | Technical Excellence  User configurability/ customisation  Relevance of the proposed way to involve clinicians and patients in design and development | Technical Excellence  User configurability/ customisation  Relevance of the proposed way to involve clinicians and patients in design and development | NGS panels,  molecular biology,  molecular pathology,  wet lab analysis,  bioinformatics,  molecular interpretation |
| **Technological Aspects**  *Production efficiency*  *WETLAB*  *<48h turn-around time*  *High grade of automatisation*  *High and low (1 sample) throughput*  *WETLAB Outputs*  *Information on [ctDNA] amount*  *Spare sample of DNA storable & preserved*  *Target capture and NGS library yield improvement in coverage*  *Selective enrichment of ctDNA frag*  *BIOINFORMATICS*  *Automatic bioinformatics interpret*  *MOLECULAR INTERPRETATION*  *Automatic processing of sequence data and reporting of identified variants, knowledgebase search and their biological interpretation.*  *REPORT*  *Fully automatized filling, available on-line, downloading & consulting, queryable and interactive.*  *Include workflow tracking system*  *REPORT OUTPUTS*  *Tacking System platform*  *oncNGS Outcome:*  *Affordable and low-turn around time solution for routine basis, at each (chemo)therapy cycle to follow clinical response and inspire adaptive therapies* | WETLAB requirements  BIOINFORMATICS  requirements  MOLECULAR INTERPRETATION requirements  WETLAB requirements  REPORTS requirements  OUTCOME requirements | Technical excellence | Technical excellence | NGS panels,  molecular biology,  molecular pathology,  wet lab analysis,  bioinformatics,  molecular interpretation,  medical oncology |
| **Technological Aspects**  Data security  *D8: Optimized data-storage opportunities within legal obligations, including GDPR obligations*  *REPORT*  *User’s and roles access privileges*  *REPORT QC*  *GDPR compliant* | REPORTS requirements | Privacy and security fulfilment | Privacy and security fulfilment | NGS panels,  molecular biology,  molecular pathology,  wet lab analysis,  bioinformatics,  molecular interpretation,  medical oncology,  GDPR |
| **Safety and sustainability**  Data safety |  | Privacy and security fulfilment | Privacy and security fulfilment | NGS panels,  molecular biology,  molecular pathology,  wet lab analysis,  bioinformatics,  molecular interpretation,  medical oncology,  GDPR |
| **Safety and sustainability**  Safety environment | OUTCOME requirements | Technical excellence | Technical excellence | waste/recycling material expert  market access and/or general business knowledge,  business angels and philanthropic social impact investors |
| **Organisational aspects**  Applicability or external validity of the studies in the national/European health and social care system |  | Value of benefits for procurers  Sustainability of the Business Case/  Scalability potential | Value of benefits for procurers  Sustainability of the Business Case/  Scalability potential | process design, market access and/or general business knowledge,  business angels and philanthropic social impact investors |
| **Costs**  Medical device costs  *Business case*  *ACCE Clinical Utility: What are the financial costs associated with testing* |  | Sustainability of the Business Case/  Scalability potential | Sustainability of the Business Case/  Scalability potential | medical oncology,  market access and/or general business knowledge,  business angels and philanthropic social impact investors |
| **Costs**  Training Costs  *Business case*  *ACCE Clinical Utility: What are the financial costs associated with testing?* |  | Sustainability of the Business Case/  Scalability potential | Sustainability of the Business Case/  Scalability potential | medical oncology,  market access and/or general business knowledge,  business angels and philanthropic social impact investors |
| **Costs**  Implementation costs  *Business case*  *ACCE Clinical Utility: What are the financial costs associated with testing?* | BUSINESS CASE requirements | Sustainability of the Business Case/  Scalability potential | Sustainability of the Business Case/  Scalability potential | medical oncology,  market access and/or general business knowledge,  business angels and philanthropic social impact investors |
| **Organisational aspects**  Costs: Maintenance costs  *Business case: increase year by year less than 10%* | BUSINESS CASE requirements | Sustainability of the Business Case/  Scalability potential | Sustainability of the Business Case/  Scalability potential | medical oncology,  market access and/or general business knowledge,  business angels and philanthropic social impact investors |
| **Process**  Reduction of process complexity  *D4: more agile decision making process* | OUTCOME requirements | Technical Excellence  User configurability/ customisation  Relevance of the proposed way to involve clinicians and patients in design and development | Technical Excellence  User configurability/ customisation  Relevance of the proposed way to involve clinicians and patients in design and development | NGS panels, molecular biology,  molecular pathology, wet lab analysis,  bioinformatics, molecular interpretation, process design |
| **Organisational aspects**  Errors reduction / Increase in accuracy  *WETLAB:*  *Internal QC – reference sample*  *Error supressing technology (molec tag, barcoding, etc..)*  *MOLECULAR INTERPRETATION*  *Indicate database interrogated and declare its limitations and technical inaccuracy* | WETLAB requirements  MOLECULAR INTERPRETATION requirements | Technical excellence | Technical excellence | NGS panels,  molecular biology,  molecular pathology,  wet lab analysis,  bioinformatics,  molecular interpretation,  medical oncology |
| **Organisational aspects**  Sensitivity  *oncNGS Outcome:*  *Improve sensitivity for a reliable detection of low amounts of ctDNA and low frequency mutations from a routine blood draw. Overcome limits of low ctDNA, low VAF.* | OUTCOME requirements | Technical excellence | Technical excellence | NGS panels,  molecular biology,  molecular pathology,  wet lab analysis,  bioinformatics,  molecular interpretation,  medical oncology |
| **Organisational aspects**  Reduction in medication consumption  *Interim endpoints:*  *Prognostics markers, Predictive markers and Theranostic markers* | BUSINESS CASE requirements | Value of benefits for patients   Sustainability of the Business Case/  Scalability potential | Value of benefits for patients Sustainability of the Business Case/  Scalability potential | medical oncology,  wet lab analysis,  bioinformatics, market access and/or general business knowledge,  business angels and philanthropic social impact investors |
| **Process:**  Training and resources |  | Value of benefits for procurers  Sustainability of the Business Case/  Scalability potential | Value of benefits for procurers  Sustainability of the Business Case/  Scalability potential | process design, market access and/or general business knowledge,  business angels and philanthropic social impact investors |
| **Technological Aspects**  Interaction and communication  *D4: Standardization and informatisation* | REPORT Requirements | Soundness of the approach to integrate with procurer systems | Soundness of the approach to integrate with procurer systems | medical oncology, ICT interoperability |
| **Technological Aspects**  Interoperability concerns  *Interim endpoint:*  *BIOINFORMATICS:*  *Detailed description of data sharing protocols*  *FIHR interoperability standard*  *BIOINFORMATICS outputs:*  *Guidelines and standards bioinf interp*  *MOLECULAR INTERPRETATION*  *Interoperable with local databases following FHIR standards*  *Standardized VCF files*  *MOLECULAR INTERPRETATION Outputs:*  *Standard VCF (Variant calling file)*  *Panel region file (BED format)*  *NGS registration in Health data platform*  *REPORT*  *Push-up notification system to inform report ready, issues, delays.*  *Harmonized report structure to easy integrate with FHIR clinical report*  *REPORT OUTPUTS*  *Different format to allow append the report in the EHR* | BIOINFORMATICS Requirements  MOLECULAR INTERPRETATION Requirements  REPORT Requirements | Soundness of the approach to integrate with procurer systems | Soundness of the approach to integrate with procurer systems | NGS panels,  molecular biology,  molecular pathology,  wet lab analysis,  bioinformatics,  molecular interpretation, medical oncology, ICT interoperability |
| **Technological Aspects**  Interoperability approaches  *oncNGS outcome:*  *Shared platform with fully customized set of genes, including molecular and clinical interpretations. Interoperable with other existing software* | OUTCOME Requirements | Soundness of the approach to integrate with procurer systems | Soundness of the approach to integrate with procurer systems | medical oncology, ICT interoperability |
| **Technological Aspects**  Connectivity |  | Soundness of the approach to integrate with procurer systems | Soundness of the approach to integrate with procurer systems | medical oncology, ICT interoperability |
| **Health system** | **Safety and sustainability**  Safety environment  *Sustainable and Environmentally friendly:*  *·Low plastic consumption*  *·Recyclable components*  *·Vendor neutral consumables* | OUTCOME requirements | Technical excellence | Technical excellence | waste/recycling material expert  market access and/or general business knowledge,  business angels and philanthropic social impact investors |
| **Economic Sustainability:** Training of staff |  | Sustainability of the Business Case/  Scalability potential | Sustainability of the Business Case/  Scalability potential | medical oncology,  market access and/or general business knowledge,  business angels and philanthropic social impact investors |
| **Economic Sustainability**: Maintenance | BUSINESS CASE Requirements | Sustainability of the Business Case/  Scalability potential | Sustainability of the Business Case/  Scalability potential | medical oncology,  market access and/or general business knowledge,  business angels and philanthropic social impact investors |
| **Economic Sustainability**: Use of staff (for each of the relevant type of staff) | BUSINESS CASE Requirements | Sustainability of the Business Case/Scalability potential | Sustainability of the Business Case/Scalability potential | medical oncology,  market access and/or general business knowledge,  business angels and philanthropic social impact investors |
| **Economic Sustainability**: Medication / Treatments - Therapy / Prosthesis  *D11: Facilitating value for money strategies with respect to expensive treatments in oncology* | BUSINESS CASE Requirements | Sustainability of the Business Case/Scalability potential | Sustainability of the Business Case/Scalability potential | medical oncology,  market access and/or general business knowledge,  business angels and philanthropic social impact investors |
| **Economic Sustainability**:  Scalability | BUSINESS CASE Requirements | Sustainability of the Business Case/Scalability potential | Sustainability of the Business Case/Scalability potential | medical oncology,  market access and/or general business knowledge,  business angels and philanthropic social impact investors |
| **Safety and Sustainability:**  Waste management | OUTCOME requirements | Technical excellence | Technical excellence | waste/recycling material expert  market access and/or general business knowledge,  business angels and philanthropic social impact investors |
| **Safety and Sustainability:**  The solution can evolve and be sustained over time  *oncNGS Outcome*  *Flexible, adaptable and sustainable panel design. The panel is upgradable/updatable with new genes based on emerging evidence* | OUTCOME requirements | Technical excellence | Technical excellence | NGS panels,  molecular biology,  molecular pathology,  wet lab analysis,  bioinformatics,  molecular interpretation,  medical oncology,  CE-IVD |

| **TIQUE Category** | **TIQUE Subcategory** | **TIQUE Short term Output/ No-health outcome** | **TIQUE Already/To be included in the description of the object of the contract** | **TIQUE To be included Bid Template** | **TIQUE To be included Awarding Criteria dimension** | **TIQUE To be included Contract Monitoring** | **TIQUE Expertise necessary to evaluate/monitor** |
| --- | --- | --- | --- | --- | --- | --- | --- |
| **Patient** | PROM | Health-related Quality of life (QoL) | *Metrics on KCCQ-121, and NYHA about peripheral oedema, disturbed sleep, maximum level of physical exertion, health related quality of life.*  *SF-12 Physical*  *SF-12 Mental*  *Pain* | Overall  Section describing proposed solution | Overall awarding criteria covering reqs and specs | Phase 1  Phase 2  Phase 3 to be specifically piloted | Healthcare professional, PROMs expert,  ICT team |
| Acceptability of the solution |  | Specific mention in subsection referring to PROMs | Overall awarding criteria covering PROMs | Planned specifically for the Phase 3 protocol | Innovation specialist, Change Manager, PROMs expert |
| Overall Satisfaction with care given |  | Specific mention in subsection referring to PROMs | Overall awarding criteria covering PROMs | Planned specifically for the Phase 3 protocol | Innovation specialist, Change Manager, PROMs expert |
| Understanding of care plan/treatment/pathways  Support to manage long-term condition  Self-reported health status  Improving Behaviour Outcome | *Training Education Digital literacy*  *Specifying ultimate goal to*  *1-* Understanding of care plan/treatment/pathways  2- Support to manage long-term condition  3- *run*  *Patient Status- devices questionnaires*  *4-Improving Behaviour Outcome* | Overall  Section describing proposed solution | Overall awarding criteria covering reqs and specs | Phase 1  Phase 2  Phase 3 to be specifically piloted | Healthcare professional, Innovation specialist, Change Manager, PROMs expert,  ICT team |
| Self-reported health status | *Patient Status- devices questionnaires* | Overall  Section describing proposed solution | Overall awarding criteria covering reqs and specs | Phase 1  Phase 2  Phase 3 to be specifically piloted | Healthcare professional,  Change Manager, PROMs expert,  ICT team |
| Improving Behaviour Outcome | *Keep track of the exercise each day vs the objectives* | Overall  Section describing proposed solution | Overall awarding criteria covering reqs and specs | Phase 1  Phase 2  Phase 3 to be specifically piloted | Healthcare professional,  PROMs expert,  ICT team |
| Bio-psycho-social functioning | *Metrics on Living Independently (PROMIS) and depression and anxiety (PHQ94), confidence/self- esteem*  *Patient Status- devices questionnaires* | Overall  Section describing proposed solution | Overall awarding criteria covering reqs and specs | Phase 1  Phase 2  Phase 3 to be specifically piloted | Healthcare professional, PROMs expert,  ICT team |
| Symptom severity | *Congestion detection without the use of invasive tools* | Overall  Section describing proposed solution | Overall awarding criteria covering reqs and specs | Phase 1  Phase 2  Phase 3 to be specifically piloted | Healthcare professional,  ICT team |
| Symptom severity | Monitor  *Body Mass Index (BMI)*  *Albumin*  *LDL Cholesterol levels*  *Systolic blood pressure*  *FEV1* | Overall  Section describing proposed solution | Overall awarding criteria covering reqs and specs | Phase 1  Phase 2  Phase 3 to be specifically piloted | Healthcare professional,  ICT team |
| PREM | Easy to use and user experience |  | Specific mention in subsection relevant to R&D plan | Overall awarding criteria covering R&D plan | Planned specifically for the Phase 3 protocol | Innovation specialist, Change Manager, PREMs expert |
| Involvement in decision-making | Patient empowerment | Overall  Section describing proposed solution | Overall awarding criteria covering reqs and specs | Phase 1  Phase 2  Phase 3 to be specifically piloted | Healthcare professional, Innovation specialist, Change Manager, PREMs expert |
| Waiting time | Record  *Waiting time* | Overall  Section describing proposed solution | Overall awarding criteria covering reqs and specs | Phase 1  Phase 2  Phase 3 to be specifically piloted | Innovation specialist, Change Manager, PREMs expert,  ICT team |
| % Reduction of patients and relatives' use of time  Confidence in the treatment  Would they recommend the service to family and friends? |  | Specific mention in subsection referring to PREMs | Overall awarding criteria covering PREMs | Planned specifically for the Phase 3 protocol | Innovation specialist, Change Manager, PREMs expert |
| Determinants of Health | Adherence to intervention/treatment | *Treatment Adjustment recommendations through the decision support system and monitoring* | Overall  Section describing proposed solution | Overall awarding criteria covering reqs and specs | Phase 1  Phase 2  Phase 3 to be specifically piloted | Healthcare professional,  ICT team |
| Adherence to intervention/treatment | *Adherence devices questionnaires* | Overall  Section describing proposed solution | Overall awarding criteria covering reqs and specs | Phase 1  Phase 2  Phase 3 to be specifically piloted | Innovation specialist, Change Manager, PREMs expert,  ICT team |
| Adverse events | Record  *Patient adverse event and complications of treatment (due to device, medication and/or hospitalization)* | Overall  Section describing proposed solution | Overall awarding criteria covering reqs and specs | Phase 1  Phase 2  Phase 3 to be specifically piloted | Healthcare professional,  ICT team |
| Overtreatment cases identification | Record  *# Patients prescribed with ACE inhibitors*  *# Patients prescribed with Angiotensin Receptor II Blocker*  *# Patients prescribed with Angiotensin Receptor Blocker/ Neprylysin Inhibitor*  *# Patients prescribed with Beta Blockers*  *# Patients prescribed with Calcium Channel Blockers*  *# Patients prescribed with Digoxin for heart failure*  *# Patients prescribed with Diuretics*  *# Patients prescribed with Ivabradina*  *And polypharmacy optimization through the decision support system* | Overall  Section describing proposed solution | Overall awarding criteria covering reqs and specs | Phase 1  Phase 2  Phase 3 to be specifically piloted | Healthcare professional,  ICT team |
| % of Relapse | *Record relapse and Hospitalization related to Heart Failure decompensations* | Overall  Section describing proposed solution | Overall awarding criteria covering reqs and specs | Phase 1  Phase 2  Phase 3 to be specifically piloted | Healthcare professional,  ICT team |
| Drug-related health problems (adverse effects, safety, drug-related morbidity) | *Decision Support System to propose Optimized polypharmacy and Treatment adjustment*  *Record medication side-effects or Drug-related health problems (adverse effects, safety, drug-related morbidity).* | Overall  Section describing proposed solution | Overall awarding criteria covering reqs and specs | Phase 1  Phase 2  Phase 3 to be specifically piloted | Healthcare professional,  ICT team |
| **Healthcare Professionals** | Benefits for the HCP | Proportion of professional with access to medical Evidence-Based information, and training to benefit from their use | *Training Education Digital literacy to offer professional with access to medical Evidence-Based information* | Overall  Section describing proposed solution | Overall awarding criteria covering reqs and specs | Phase 1  Phase 2  Phase 3 to be specifically piloted | Healthcare professional |
| Level of involvement in design process |  | Specific mention in subsection relevant to R&D plan | Overall awarding criteria covering R&D plan | Phase 1  Phase 2  Phase 3 | Healthcare Professionals, Innovation specialist, Change Manager |
| Electronic medical records | Integrated care planning platform | Overall  Section describing proposed solution | Overall awarding criteria covering reqs and specs | Phase 1  Phase 2  Phase 3 to be specifically piloted | Healthcare professional,  ICT team |
| Usability of the solution  Acceptability of the solution |  | Specific mention in subsection relevant to R&D plan | Overall awarding criteria covering R&D plan | Planned specifically for the Phase 3 protocol | Healthcare management, Innovation specialist, Change Manager |
| Workplace environment/culture outcomes | - Assess training effectiveness for HCP  - *Evaluating changes in the culture of your organization* |  | Specific mention in subsection relevant to R&D plan | Overall awarding criteria covering R&D plan | Planned specifically for the Phase 3 protocol | Healthcare management, Innovation specialist, Change Manager |
| **Healthcare provider** | Organizational aspects | Number of rehospitalisations/readmissions rates | Record number of:  -number of rehospitalisations  -number of readmissions  -number of *Inpatient episodes*  Show:  -Number of rehospitalisations/readmissions rates | Overall  Section describing proposed solution | Overall awarding criteria covering reqs and specs | Phase 1  Phase 2  Phase 3 to be specifically piloted | Healthcare management, Healthcare professional,  ICT team |
| Number of urgent visits  Number of specialist visits  Actual vs. Expected hospital stay  Home Hospitalization  Number of visits in primary care  Unplanned potentially preventable inpatient episodes | Record number of:  *# of ED attendances*  *# Days in the emergency room in the last 6 months*  *# Home care assistants not requiring emergency interventions*  *acute hospital emergency admission*  *Emergency episodes at primary healthcare*  *Emergency episodes at hospitals*  *Numbers of emergency department visits*  *Numbers and diagnoses for emergency hospital admissions and multiple emergency hospital admissions*  *# of follow-up Hospital’s Appointments*  *Outpatient visits*  *Numbers of outpatient attendances*  Actual hospital stay  Expected hospital stay  *# of Home Hospitalization*  *Provision of home care attention*  *the proportion of older people with intensive care needs and/or lower levels of care needs who are receiving care at home*  *the proportion of older people receiving (free) personal care at home*  *home care provision for older people*  *respite care for informal carers*  *council/municipality provision of supported or sheltered accommodation*  *information on care homes*  Number of visits in primary care  *Family physicians’ visits at PHC (primary healthcare centres)*  *Family nurses’ visits at PHC*  *Family physician home-visits*  *Family nurses home-visits*  *Unplanned potentially preventable inpatient episodes*  *information on unscheduled care* | Overall  Section describing proposed solution | Overall awarding criteria covering reqs and specs | Phase 1  Phase 2  Phase 3 to be specifically piloted | Healthcare management, Healthcare professional,  ICT team |
| Patient wills | *Will consensus document (in the countries on has legal validity)*  *Advance directives and Legal powers of Attorney (as defined at local level)*  *Record of:*  *- hospital deaths for hospitalized patients*  *-end-of-life care at home*  *Ethical considerations* | Overall  Section describing proposed solution  Subsection describing ethical aspects | Overall awarding criteria covering reqs and specs  Awarding criteria related with ethical aspects | Phase 1  Phase 2  Phase 3 to be specifically piloted | Healthcare management, Healthcare professional,  ICT team,  Ethical expert |
| Costs | Costs | Record Length of hospital stays  Record costs/human and material resources consumption during hospital stay  Show:  Delayed discharge from hospital  Total costs per year of the no. of extension of the LOS compared to average LOS/patient  Total costs per year of the no. of cases that represent a significant extension of the LOS compared to the LOS reimbursed by the insurer | Overall  Section describing proposed solution | Overall awarding criteria covering reqs and specs | Phase 1  Phase 2  Phase 3 to be specifically piloted | Healthcare management, Healthcare professional,  ICT team,  Financial team |
| Process | Assessment of:  *Management of Transitions*  *Communication* |  | Specific mention in subsection relevant to R&D plan | Overall awarding criteria covering R&D plan | Planned specifically for the Phase 3 protocol | Healthcare management, Innovation specialist, Change Manager |
| Technological Aspects | Interoperability approaches | Interoperability and Integration | Overall  Section describing proposed solution | Overall awarding criteria covering reqs and specs | Phase 1  Phase 2  Phase 3 to be specifically piloted | Innovation specialist, ICT team |
| **Health System** | Economic Sustainability | Healthcare providers transparent budget monitoring | Record costs/human and material resources consumption per patient during:  home care  home hospitalization  hospital admissions  emergency hospital admissions  routine hospital/out patient visit | Overall  Section describing proposed solution | Overall awarding criteria covering reqs and specs | Phase 1  Phase 2  Phase 3 to be specifically piloted | Innovation specialist, ICT team,  Financial team |
| Investment in hardware and software/digital services  Training of staff  Maintenance  Use of staff (for each of the relevant type of staff)  Patients’ use of time  Relatives’ use of time |  | Specific mention in subsection dedicated to business plan and future exploitation aligned to business case | Overall awarding criteria covering business plan and future exploitation aligned to business case | Phase 1  Phase 2  Phase 3 | Innovation specialist, ICT team,  Financial team |
| Scalability  Replicability |  | Specific mention in subsection dedicated to business plan and future exploitation aligned to business case | Overall awarding criteria covering business plan and future exploitation aligned to business case | Phase 1  Phase 2  Phase 3 | Innovation specialist, ICT team,  Financial team, Payor expert |
| Long-Term treatment improvement | Cost Effectiveness Analysis | *Demonstrate* Cost Effectiveness  analysing: *Patient outcomes, experiences and safety*  *Costs at patient level*  *-Efficiency*  *-Funding schemes based on population and risk sharing among all stakeholders involved in patient treatment*  *-Moving for bundled payments for Value for clinical condition* | Specific mention in subsection dedicated to business plan and future exploitation aligned to business case | Overall awarding criteria covering business plan and future exploitation aligned to business case | Phase 1  Phase 2  Phase 3 | Innovation adoption expert,  Payor expert |
| Survival rate after diagnosis | *Record diagnosis date*  *And calculate:*  *1-year survival rate after diagnosis*  *2-year survival rate after diagnosis*  *5-year survival rate after diagnosis* |  | Overall awarding criteria covering business plan and future exploitation aligned to business case | Phase 1  Phase 2  Phase 3 | Innovation adoption expert,  Payor expert |
| **Socio-economic impact** | Social determinants | Equalities considerations | *Demonstrate* Cost Effectiveness  analysing:  -Equal access to health care for those in equal need of health care.  -Equal utilisation of health care for those in equal need of health care.  -Equal (or, rather, equitable) health outcomes (as measured by, for example, quality adjusted life expectancy). | Specific mention in subsection dedicated to business plan and future exploitation aligned to business case | Overall awarding criteria covering business plan and future exploitation aligned to business case | Phase 1  Phase 2  Phase 3 | Innovation adoption expert,  Payor expert |
| EcoQUIP Plus **Category** | EcoQUIP Plus **Subcategory** | EcoQUIP Plus **Short term Output/ No-health outcome** | EcoQUIP Plus **Already/To be included in the description of the object of the contract** | EcoQUIP Plus **To be included Bid Template** | EcoQUIP Plus **To be included Awarding Criteria dimension** | EcoQUIP Plus **To be included Contract Monitoring** | EcoQUIP Plus **Expertise necessary to evaluate/monitor** |
| **Patient** | PROM | Improvements in functional outcomes | *Patient Status- devices questionnaire* | Section describing proposed solution | Overall awarding criteria covering reqs and specs | After surgery  Month 6  1 year | Healthcare professional,  Change Manager, PROMs expert,  ICT team |
| Self-reported health status | *Patient Status- devices questionnaires* | Overall  Section describing proposed solution | Overall awarding criteria covering reqs and specs | After surgery  Month 6  1 year | Healthcare professional,  Change Manager, PROMs expert,  ICT team |
| PREM | User evaluation of satisfaction | *Patient Satisfaction- devices questionnaires* | Overall  Section describing proposed solution | Overall awarding criteria covering reqs and specs | After surgery | Healthcare professional,  Change Manager, PREMs expert,  ICT team |
| Determinants of Health | Diagnostic accuracy | *Patient adverse event and complications of treatment (due to device, medication and/or hospitalization)* | Overall  Section describing proposed solution | Overall awarding criteria covering reqs and specs | After surgery | Healthcare professional,  Change Manager, PREMs expert,  ICT team |
| Less surgery complications | *Record related to surgery complications* | Overall  Section describing proposed solution | Overall awarding criteria covering reqs and specs | Month 6  1 year | Healthcare professional,  ICT team |
| Adverse events | Adverse events related with surgery such as: blood complications, microbial infections,... | Overall  Section describing proposed solution | Overall awarding criteria covering reqs and specs | Month 6  1 year  Phase 3 to be specifically piloted | Healthcare professional,  ICT team |
| **Healthcare Professionals** | Benefits for the HCP | Proportion of professional with access to medical Evidence-Based information, and training to benefit from their use | *Training Education Digital literacy to offer professional with access to medical Evidence-Based information* | Overall  Section describing proposed solution | Overall awarding criteria covering reqs and specs | Month 3  Month 6  Month 9  Month 12 | Healthcare professional |
| Usability of the solution  Acceptability of the solution | *Usability and acceptability questionnaire* | Overall  Section describing proposed solution | Overall awarding criteria covering reqs and specs | Month 3  Month 6  Month 9  Month 12 | Healthcare professional |
| Workplace environment/culture outcomes | Assess training effectiveness for HCP  - *Evaluating changes in the culture of your organization* | *Training Education Digital literacy to offer professional with access to medical Evidence-Based information* | Overall  Section describing proposed solution | Overall awarding criteria covering reqs and specs | Month 3  Month 6  Month 9  Month 12 | Healthcare professional |
| **Healthcare provider** | Organizational aspects | Number of rehospitalisations/readmissions rates | Record number of:  -number of rehospitalisations  -number of readmissions  -number of *Inpatient episodes*  Show:  -Number of rehospitalisations/readmissions rates | Overall  Section describing proposed solution | Overall awarding criteria covering reqs and specs | Month 6  1 year | Healthcare management, Healthcare professional,  ICT team |
| Number of bed days for hospitalised patients | Overall or by condition over a set time period | Overall  Section describing proposed solution | Overall awarding criteria covering reqs and specs  Awarding criteria related with ethical aspects | Month 6  1 year | Healthcare management, Healthcare professional,  ICT team,  Ethical expert |
| Costs | Costs | 3D Equipment costs  Software Costs  Training Costs  Implementation Costs  Maintenance Costs | Overall  Section describing proposed solution | Overall awarding criteria covering reqs and specs | Offer assessment | Healthcare management, Healthcare professional,  ICT team,  Financial team |
| Waste Reduction Costs | Water and Energy Reduction Costs | Overall  Section describing proposed solution | Overall awarding criteria covering reqs and specs | Month 6  1 year | Healthcare management, Healthcare professional,  ICT team,  Financial team |
| Process | Workflow | Time reduction (past vs. present) in the design and impression delivery  Total traceability assurance | Overall  Section describing proposed solution | Overall awarding criteria covering reqs and specs | Month 3  Month 6  Month 9  Month 12 | Healthcare management, Healthcare professional,  ICT team |
| Designed and produced personalised cases | Number of designed and produced anatomical model, surgical guide and prosthesis. | Overall  Section describing proposed solution | Overall awarding criteria covering reqs and specs | Month 3  Month 6  Month 9  Month 12 | Healthcare management, Healthcare professional,  ICT team |
| 3D equipment Training and resources | Existing training resources for hospital staff | Overall  Section describing proposed training actions | Overall awarding criteria covering reqs and specs | Month 1  Month 3 | Healthcare management, Healthcare professional,  ICT team |
| Software training and resources | Existing training resources for hospital staff | Overall  Section describing proposed training actions | Overall awarding criteria covering reqs and specs | Month 3  Month 6  Month 12 | Healthcare management, Healthcare professional,  ICT team |
| Technological Aspects | Interoperability approaches | Interoperability and Integration of software system into 3DLab (Microsoft 365) and Hospital Information System (HIS)  Adaptation to 3DLab specific needs  Ensure UE MDR 2017/745 and ISO 13485 completion  All generated information secure collection and impression | Overall  Section describing proposed solution | Overall awarding criteria covering reqs and specs | Offer assessment | Innovation specialist, ICT team |
| **Health System** | Safety and sustainability | Data safety | Protecting data against loss by ensuring safe storage and making regular back-ups of your data | Overall  Section describing proposed solution | Overall awarding criteria covering reqs and specs | Offer assessment | Innovation specialist, ICT team |
| Economic Sustainability | Healthcare providers transparent budget monitoring | Record costs/human and material resources consumption per patient during:  home care  home hospitalization  hospital admissions  emergency hospital admissions  routine hospital/outpatient visit | Overall  Section describing proposed solution | Overall awarding criteria covering reqs and specs | Phase 1  Phase 2  Phase 3 to be specifically piloted | Innovation specialist, ICT team,  Financial team |
| Investment in hardware and software/digital services  Training of staff  Maintenance  Use of staff (for each of the relevant type of staff) | 3D Equipment costs  Software Costs  Training Costs  Implementation Costs  Maintenance Costs | Specific mention in subsection dedicated to business plan and future exploitation aligned to business case | Overall awarding criteria covering business plan and future exploitation aligned to business case | Offer Assessment | Innovation specialist, ICT team,  Financial team |
| Scalability  Replicability | Potential of the integrated solution or individual components of the solution to be replicable and scalable to other units in CCSPT and/or other hospitals | Specific mention in subsection dedicated to business plan and future exploitation aligned to business case | Overall awarding criteria covering business plan and future exploitation aligned to business case | Year 1  Year 2 | Innovation specialist, ICT team,  Financial team, Payor expert |
| Long-Term treatment improvement | Cost Effectiveness Analysis | *Demonstrate* Cost Effectiveness  analysing: *Patient outcomes, experiences and safety*  *Costs at patient level*  *-Efficiency*  *-Funding schemes based on population and risk sharing among all stakeholders involved in patient treatment*  *-Moving for bundled payments for Value for clinical condition* | Specific mention in subsection dedicated to business plan and future exploitation aligned to business case | Overall awarding criteria covering business plan and future exploitation aligned to business case | Year 1  Year 2  Year 3 | Innovation adoption expert,  Payor expert |
| **Socio-economic impact** | Social determinants | Equalities considerations | *Demonstrate* Cost Effectiveness  analysing:  -Equal access to health care for those in equal need of health care.  -Equal utilisation of health care for those in equal need of health care.  -Equal (or, rather, equitable) health outcomes (as measured by, for example, quality adjusted life expectancy). | Specific mention in subsection dedicated to business plan and future exploitation aligned to business case | Overall awarding criteria covering business plan and future exploitation aligned to business case | Year 1  Year 2  Year 3 | Innovation adoption expert,  Payor expert |
